# Supplementary material for: Selenium yeast modulated ileal transcriptome and microbiota to ameliorate egg production in aged laying hens
Source: Research Square preprint supplement (doi:10.21203/rs.3.rs-104581/v1), 2020-11-13
Supplement: Supplementary file 1 [file 0f18ce1ad5b012e35b4b5834.xlsx]

## Sheet: interesting module GSEA results
blue
gnf2_cdc20
gnf2_cdc2
gnf2_cenpe
gnf2_ccna2
gnf2_ccnb2
gnf2_espl1
gnf2_rfc3
gnf2_rfc4
gnf2_bub1b
gnf2_cd7
gnf2_hmmr
kegg_ribosome
reactome_dna_strand_elongation
newman_ercc6_targets_dn
graham_cml_quiescent_vs_normal_dividing_up
liang_silenced_by_methylation_2
krasnoselskaya_ilf3_targets_up
smid_breast_cancer_relapse_in_pleura_dn
moserle_ifna_response
matzuk_meiotic_and_dna_repair
kuuselo_pancreatic_cancer_19q13_amplification
valk_aml_cluster_9
naba_basement_membranes
go_regulation_of_cardiac_muscle_cell_differentiation
go_detection_of_chemical_stimulus_involved_in_sensory_perception_of_taste
go_mrna_cis_splicing_via_spliceosome
go_collagen_catabolic_process
go_sensory_perception_of_bitter_taste
go_postsynapse_assembly
go_carbohydrate_transmembrane_transporter_activity
reactome_activation_of_matrix_metalloproteinases
brown
morf_bmpr2
morf_znf10
car_hpx
car_igfbp1
kegg_fatty_acid_metabolism
kegg_steroid_hormone_biosynthesis
reactome_bile_acid_and_bile_salt_metabolism
reactome_synthesis_of_bile_acids_and_bile_salts
joseph_response_to_sodium_butyrate_up
kang_glis3_targets
go_bile_acid_biosynthetic_process
go_neutral_lipid_catabolic_process
go_triglyceride_catabolic_process
go_glycerolipid_catabolic_process
go_bile_acid_metabolic_process
go_steroid_dehydrogenase_activity
go_fatty_acid_binding
go_monocarboxylic_acid_binding
go_oxidoreductase_activity_acting_on_paired_donors_with_incorporation_or_reduction_of_molecular_oxygen_nad_p_h_as_one_donor_and_incorporation_of_one_atom_of_oxygen
reactome_metabolism_of_steroids
darkgrey
cdpcr1_01
cdpcr3hd_01
pbx1_02
cagnwmcnnngac_unknown
nrsf_01
aagcaat_mir137
cattgtyy_sox9_b1
wei_mir34a_targets
gse37416_ctrl_vs_3h_f_tularensis_lvs_neutrophil_dn
gse7460_treg_vs_tconv_act_dn
gse19941_unstim_vs_lps_stim_il10_ko_nfkbp50_ko_macrophage_up
gse34156_untreated_vs_24h_nod2_and_tlr1_tlr2_ligand_treated_monocyte_dn
gse46606_unstim_vs_cd40l_il2_il5_3day_stimulated_irf4high_sorted_bcell_up
go_peptidyl_serine_modification
go_transferase_activity_transferring_hexosyl_groups
go_manganese_ion_binding
go_udp_glycosyltransferase_activity
go_acetylglucosaminyltransferase_activity
green
atr pathway
amb2 neutrophils pathway
metabolism of non coding rna
transport of mature transcript_x000D_ to cytoplasm
mRNA splicing minor pathway
meiotic chromosome segregation
c21 steroid hormone metabolic_x000D_ process
regulation of membrane_x000D_ depolarization
protein lipid complex assembly
positive regulation of b cell_x000D_ proliferation
skeletal muscle contraction
positive regulation of acute_x000D_ inflammatory response
organ or tissue specific immune_x000D_ response
positive regulation of_x000D_ telomerase activity
regulation of acute_x000D_ inflammatory response
positive regulation of_x000D_ vasoconstriction
protein lipid complex subunit_x000D_ organization
rna capping
regulation of sensory_x000D_ perception
chromosome organization_x000D_ involved in meiotic cell cycle
leukocyte adhesion to vascular_x000D_ endothelial cell
response to IL6
ketone biosynthetic process
regulation of b cell_x000D_ proliferation
homologous chromosome_x000D_ segregation
positive regulation of lipase_x000D_ activity
mRNA cis splicing via_x000D_ spliceosome
positive regulation of b cell_x000D_ activation
synapsis
extracellular matrix component
euchromatin
clathrin coated endocytic_x000D_ vesicle membrane
scavenger receptor activity
peptide hormone binding
snrna binding
secretion by tissue
regulatory t cell_x000D_ differentiation
arachidonic acid secretion
activated t cell proliferation
negative regulation of cell_x000D_ migration involved in sprouting_x000D_ angiogenesis
ncrna export from nucleus
molecular carrier activity
formation of the early_x000D_ elongation complex
transport of the slbp dependant_x000D_ mature mrna
transport of mature mrnas_x000D_ derived from intronless_x000D_ transcripts
plasma lipoprotein assembly_x000D_ remodeling and clearance
intra golgi traffic
plasma lipoprotein remodeling
turquoise
tsai_response_to_radiation_therapy
go_atp_hydrolysis_coupled_transmembrane_transport

## Sheet: hub gene list
MEblue	MEbrown	MEturquoise
COPG2	ENSGALG00000054163	COG5
USP6NL	GPR162	IRAK4
HBP1	ARHGEF17	ARID2
DLD	ILK	PPM1H
KIF21A	gga-mir-1600	TBK1
PLXNB2	HOXA9	CDK17
PUS7L	TMEM158	WASHC4
SCAF11	LOC107052850	TDG
C12orf66	MEIS1	DNM1L
CAND1	NHSL2	STK38L
TBC1D15	TMEM35A	CBLB
TMTC3	MAB21L2	LTN1
SLC25A3	HAND2	TRAPPC10
FAM83F	IL11RA	USP9X
PICK1	TESK1	MED14
MYH9	NPR2	GCC2
WASHC4	TPM2	TPP2
TXNRD1	ENSGALG00000045548	DZIP1
GNPTAB	PGF	COG3
MKRN4P	IGFBP5	WAC
DENND5B	CRTAC1	YME1L1
HDHD5	SLIT1	MIOS
C2CD5	LZTS2	SCIN
KRAS	DDR2	STT3B
FGFR1OP2	ECE2	CAPN7
STK38L	ENSGALG00000002678	DNAJC13
NUP50	ISL2	GOLGA4
TTC38L	CORO2B	BRD9
BCL2L14	CCDC102A	ATP9B
KLHDC10	ENSGALG00000053846	KIN

## Sheet: hub gene GO analysis
Term	Ref	fold_Enrichment	pvalue	Category	Module	Genes
activation of GTPase activity	46	21.47	0.00416	BP	blue	IGFBP5;HAND2;ILK;DDR2
protein secretion	77	12.83	0.0109	BP	blue	ILK;LZTS2
establishment of protein localization to extracellular region	77	12.83	0.0109	BP	blue	ILK;LZTS2
protein localization to extracellular region	82	12.05	0.0123	BP	blue	HAND2;ILK
peptide secretion	85	11.62	0.0131	BP	blue	ILK;DDR2
striated muscle cell differentiation	109	9.06	0.0208	BP	blue	IGFBP5;HAND2
protein targeting	123	8.03	0.026	BP	blue	ILK;LZTS2
muscle cell differentiation	131	7.54	0.0292	BP	blue	ILK;LZTS2
secretion by cell	198	7.48	0.00737	BP	blue	ILK;LZTS2
wound healing	133	7.43	0.03	BP	blue	ILK;LZTS2
microtubule-based movement	139	7.11	0.0325	BP	blue	TESK1;CORO2B
export from cell	216	6.86	0.00932	BP	blue	HAND2;ILK
endomembrane system organization	221	6.7	0.00992	BP	blue	ILK;DDR2
secretion	234	6.33	0.0116	BP	blue	TESK1;CORO2B
intracellular protein transport	470	6.3	0.000277	BP	blue	ILK;LZTS2
positive regulation of proteolysis	159	6.21	0.0414	BP	blue	IGFBP5;HAND2;ILK;DDR2
response to wounding	160	6.17	0.0418	BP	blue	ILK;LZTS2
establishment of protein localization to organelle	169	5.84	0.0461	BP	blue	TESK1;CORO2B
microtubule-based process	372	3.98	0.0384	BP	blue	ILK;LZTS2
Golgi membrane	243	6.1	0.0128	CC	blue	GNPTAB;PICK1;COPG2
motor activity	72	13.72	0.00964	MF	blue	MYH9;KIF21A
Rab GTPase binding	83	11.9	0.0126	MF	blue	USP6NL;TBC1D15
GTPase activator activity	141	7.01	0.0333	MF	blue	USP6NL;TBC1D15
GTPase regulator activity	153	6.46	0.0386	MF	blue	USP6NL;TBC1D15
regulation of osteoblast differentiation	64	28.29	1.35e-05	BP	brown	IGFBP5;HAND2;ILK;DDR2
ureteric bud morphogenesis	34	26.63	0.0028	BP	brown	ILK;LZTS2
mesonephric tubule morphogenesis	35	25.87	0.00296	BP	brown	ILK;LZTS2
peripheral nervous system development	36	25.15	0.00312	BP	brown	HAND2;ILK
positive regulation of osteoblast differentiation	36	25.15	0.00312	BP	brown	ILK;DDR2
negative regulation of ossification	37	24.47	0.00328	BP	brown	IGFBP5;HAND2
nephron tubule morphogenesis	41	22.08	0.00398	BP	brown	ILK;LZTS2
nephron epithelium morphogenesis	44	20.58	0.00454	BP	brown	ILK;LZTS2
nephron morphogenesis	44	20.58	0.00454	BP	brown	ILK;LZTS2
renal tubule morphogenesis	44	20.58	0.00454	BP	brown	ILK;LZTS2
regulation of stress fiber assembly	46	19.68	0.00494	BP	brown	TESK1;CORO2B
outflow tract morphogenesis	47	19.26	0.00514	BP	brown	HAND2;ILK
positive regulation of ossification	50	18.11	0.00577	BP	brown	ILK;DDR2
regulation of actomyosin structure organization	50	18.11	0.00577	BP	brown	TESK1;CORO2B
nephron tubule development	50	18.11	0.00577	BP	brown	ILK;LZTS2
regulation of ossification	102	17.75	7.76e-05	BP	brown	IGFBP5;HAND2;ILK;DDR2
ureteric bud development	54	16.77	0.00667	BP	brown	ILK;LZTS2
regulation of actin filament bundle assembly	54	16.77	0.00667	BP	brown	TESK1;CORO2B
kidney morphogenesis	54	16.77	0.00667	BP	brown	ILK;LZTS2
renal tubule development	54	16.77	0.00667	BP	brown	ILK;LZTS2
mesonephric tubule development	56	16.17	0.00714	BP	brown	ILK;LZTS2
mesonephric epithelium development	56	16.17	0.00714	BP	brown	ILK;LZTS2
mesonephros development	57	15.88	0.00738	BP	brown	ILK;LZTS2
nephron epithelium development	61	14.84	0.00838	BP	brown	ILK;LZTS2
negative regulation of binding	67	13.51	0.00998	BP	brown	CRTAC1;HAND2
nephron development	71	12.75	0.0111	BP	brown	ILK;LZTS2
kidney epithelium development	82	11.04	0.0145	BP	brown	ILK;LZTS2
regulation of muscle system process	83	10.91	0.0149	BP	brown	IGFBP5;HAND2
cell-substrate adhesion	85	10.65	0.0155	BP	brown	ILK;CORO2B
limb morphogenesis	91	9.95	0.0176	BP	brown	HAND2
appendage morphogenesis	92	9.84	0.018	BP	brown	HAND2
ameboidal-type cell migration	95	9.53	0.0191	BP	brown	HAND2;ILK
negative regulation of cell development	158	8.6	0.00511	BP	brown	ISL2;MEIS1;NPR2
epithelial tube morphogenesis	161	8.44	0.00538	BP	brown	HAND2;ILK;LZTS2
limb development	112	8.08	0.0258	BP	brown	HAND2
appendage development	113	8.01	0.0262	BP	brown	HAND2
negative regulation of neuron differentiation	114	7.94	0.0267	BP	brown	ISL2;MEIS1
bone development	122	7.42	0.0302	BP	brown	MEIS1;NPR2
cytokine-mediated signaling pathway	122	7.42	0.0302	BP	brown	IL11RA;ILK
anterior/posterior pattern specification	128	7.07	0.0329	BP	brown	HOXA9;HAND2
negative regulation of cell differentiation	331	6.84	0.000711	BP	brown	ISL2;MEIS1;IGFBP5;HAND2;NPR2
regulation of canonical Wnt signaling pathway	139	6.51	0.0382	BP	brown	ILK;LZTS2
regulation of system process	211	6.44	0.0112	BP	brown	IGFBP5;HAND2;CORO2B
negative regulation of neurogenesis	141	6.42	0.0391	BP	brown	ISL2;MEIS1
skeletal system development	285	6.35	0.00339	BP	brown	HOXA9;MEIS1;HAND2;NPR2
kidney development	143	6.33	0.0401	BP	brown	ILK;LZTS2
regulation of actin filament organization	145	6.24	0.0412	BP	brown	TESK1;CORO2B
renal system development	150	6.04	0.0437	BP	brown	ILK;LZTS2
heart morphogenesis	152	5.96	0.0448	BP	brown	HAND2;ILK
morphogenesis of an epithelium	229	5.93	0.0139	BP	brown	HAND2;ILK;LZTS2
negative regulation of nervous system development	153	5.92	0.0453	BP	brown	ISL2;MEIS1
cell population proliferation	244	5.57	0.0164	BP	brown	IGFBP5;HAND2;DDR2
pattern specification process	247	5.5	0.017	BP	brown	HOXA9;HAND2
tube morphogenesis	337	5.37	0.00611	BP	brown	MEIS1;HAND2;ILK;LZTS2
tube development	439	5.16	0.00246	BP	brown	MEIS1;IGFBP5;HAND2;ILK;LZTS2
negative regulation of developmental process	458	4.94	0.00295	BP	brown	ISL2;MEIS1;IGFBP5;HAND2;NPR2
positive regulation of cell population proliferation	378	4.79	0.00908	BP	brown	IGFBP5;IL11RA;ILK;DDR2
actin cytoskeleton organization	284	4.78	0.0244	BP	brown	TPM2;TESK1;CORO2B
negative regulation of cell population proliferation	285	4.77	0.0246	BP	brown	IGFBP5;ILK;LZTS2
cellular response to cytokine stimulus	293	4.64	0.0264	BP	brown	IL11RA;NPR2;ILK
heart development	299	4.54	0.0278	BP	brown	HAND2;ILK
tissue morphogenesis	306	4.44	0.0295	BP	brown	HAND2;ILK;LZTS2
actin filament-based process	310	4.38	0.0305	BP	brown	TPM2;TESK1;CORO2B
response to cytokine	336	4.04	0.0373	BP	brown	IL11RA;NPR2;ILK
circulatory system development	455	3.98	0.0169	BP	brown	MEIS1;HAND2;ILK
protein phosphorylation	472	3.84	0.0191	BP	brown	NPR2;TESK1;ILK;DDR2
focal adhesion	97	9.33	0.0198	CC	brown	ILK;CORO2B
cell-substrate junction	104	8.71	0.0225	CC	brown	ILK;CORO2B
actin cytoskeleton	267	5.09	0.0208	CC	brown	TPM2;CCDC102A;DDR2
growth factor binding	80	11.32	0.0139	MF	brown	IGFBP5;IL11RA
peptide binding	123	7.36	0.0306	MF	brown	TMEM158;NPR2
actin filament binding	126	7.19	0.032	MF	brown	TPM2;CORO2B
amide binding	155	5.84	0.0463	MF	brown	TMEM158;NPR2
actin binding	240	5.66	0.0157	MF	brown	TPM2;CORO2B
protein kinase activity	388	4.67	0.00993	MF	brown	NPR2;TESK1;ILK;DDR2
DNA-binding transcription factor activity	419	4.32	0.0129	MF	brown	ISL2;MEIS1;HAND2
RNA polymerase II cis-regulatory region sequence-specific DNA binding	330	4.12	0.0357	MF	brown	HOXA9;MEIS1;HAND2
RNA polymerase II regulatory region sequence-specific DNA binding	451	4.02	0.0165	MF	brown	HOXA9;MEIS1;HAND2
RNA polymerase II regulatory region DNA binding	453	4	0.0167	MF	brown	HOXA9;MEIS1;HAND2
phosphotransferase activity	454	3.99	0.0168	MF	brown	NPR2;TESK1;ILK;DDR2
cis-regulatory region sequence-specific DNA binding	347	3.91	0.0404	MF	brown	HOXA9;MEIS1;HAND2
cis-regulatory region binding	348	3.9	0.0407	MF	brown	HOXA9;MEIS1;HAND2
transcription regulatory region sequence-specific DNA binding	477	3.8	0.0198	MF	brown	HOXA9;MEIS1;HAND2
retrograde vesicle-mediated transport	31	26.96	0.00276	BP	turq	COG3;ATP9B
regulation of actin filament depolymerization	31	26.96	0.00276	BP	turq	SCIN
negative regulation of protein depolymerization	34	24.58	0.00328	BP	turq	SCIN
negative regulation of actin filament polymerization	34	24.58	0.00328	BP	turq	SCIN
negative regulation of protein-containing complex disassembly	35	23.88	0.00347	BP	turq	SCIN
positive regulation of macroautophagy	35	23.88	0.00347	BP	turq	TBK1;WAC
endosome organization	38	21.99	0.00404	BP	turq	WASHC4;DNAJC13
negative regulation of protein polymerization	42	19.9	0.00487	BP	turq	SCIN
regulation of protein depolymerization	46	18.17	0.00578	BP	turq	SCIN
retrograde transport	51	16.39	0.00701	BP	turq	TRAPPC10;GCC2
maintenance of protein location	52	16.07	0.00727	BP	turq	SCIN;DZIP1
Golgi vesicle transport	168	14.92	2.69e-06	BP	turq	GOLGA4;COG5;TRAPPC10;COG3;GCC2;ATP9B
regulation of macroautophagy	59	14.17	0.0092	BP	turq	TBK1;WAC
regulation of protein-containing complex disassembly	60	13.93	0.00949	BP	turq	SCIN
positive regulation of autophagy	63	13.27	0.0104	BP	turq	TBK1;WAC
negative regulation of protein-containing complex assembly	73	11.45	0.0137	BP	turq	SCIN
negative regulation of supramolecular fiber organization	73	11.45	0.0137	BP	turq	SCIN
Golgi organization	75	11.14	0.0144	BP	turq	COG3;GCC2
negative regulation of cytoskeleton organization	77	10.85	0.0151	BP	turq	SCIN
maintenance of location	80	10.45	0.0162	BP	turq	SCIN;DZIP1
cytosolic transport	81	10.32	0.0166	BP	turq	TRAPPC10;GCC2
endosomal transport	122	10.28	0.00316	BP	turq	WASHC4;TRAPPC10;GCC2
regulation of autophagy	129	9.72	0.00369	BP	turq	TBK1;WAC;DNM1L
peptidyl-serine phosphorylation	91	9.18	0.0205	BP	turq	TBK1;STK38L
regulation of actin filament polymerization	93	8.99	0.0214	BP	turq	SCIN
regulation of actin filament length	102	8.19	0.0253	BP	turq	SCIN
regulation of actin polymerization or depolymerization	102	8.19	0.0253	BP	turq	SCIN
peptidyl-serine modification	103	8.11	0.0257	BP	turq	TBK1;STK38L
endomembrane system organization	221	7.56	0.00185	BP	turq	WASHC4;COG3;GCC2;DNAJC13
regulation of protein polymerization	121	6.91	0.0345	BP	turq	SCIN
protein complex oligomerization	131	6.38	0.0397	BP	turq	YME1L1;DNM1L
positive regulation of response to external stimulus	135	6.19	0.0419	BP	turq	TBK1;DNM1L
protein glycosylation	137	6.1	0.043	BP	turq	COG3;STT3B
macromolecule glycosylation	137	6.1	0.043	BP	turq	COG3;STT3B
regulation of cellular component size	208	6.03	0.0134	BP	turq	GOLGA4;SCIN
regulation of actin filament organization	145	5.76	0.0476	BP	turq	SCIN
glycosylation	147	5.69	0.0488	BP	turq	COG3;STT3B
cell population proliferation	244	5.14	0.0204	BP	turq	TBK1;YME1L1;ARID2
protein localization to organelle	345	4.85	0.00887	BP	turq	COG3;GCC2;DZIP1;DNM1L
proteolysis involved in cellular protein catabolic process	346	4.83	0.00896	BP	turq	USP9X;LTN1;YME1L1;STT3B
regulation of anatomical structure size	270	4.64	0.0265	BP	turq	GOLGA4;SCIN
cellular protein catabolic process	360	4.64	0.0102	BP	turq	USP9X;LTN1;YME1L1;STT3B
protein catabolic process	391	4.28	0.0135	BP	turq	USP9X;LTN1;YME1L1;STT3B
positive regulation of organelle organization	296	4.24	0.0334	BP	turq	SCIN;DZIP1;DNM1L
ubiquitin-dependent protein catabolic process	300	4.18	0.0346	BP	turq	USP9X;LTN1;STT3B
modification-dependent protein catabolic process	307	4.08	0.0366	BP	turq	USP9X;LTN1;STT3B
modification-dependent macromolecule catabolic process	314	3.99	0.0387	BP	turq	USP9X;LTN1;STT3B
positive regulation of immune system process	314	3.99	0.0387	BP	turq	SCIN;TBK1;DNM1L
protein ubiquitination	333	3.76	0.0448	BP	turq	WAC;LTN1;CBLB
protein modification by small protein conjugation or removal	445	3.76	0.0207	BP	turq	USP9X;WAC;LTN1;CBLB
cellular macromolecule catabolic process	462	3.62	0.0234	BP	turq	USP9X;LTN1;YME1L1;STT3B
protein phosphorylation	472	3.54	0.0251	BP	turq	CDK17;TBK1;STK38L;IRAK4
vesicle tethering complex	53	23.65	0.000308	CC	turq	COG5;TRAPPC10;COG3
brush border	48	17.41	0.00626	CC	turq	SCIN;DNM1L
cluster of actin-based cell projections	74	11.29	0.014	CC	turq	SCIN;DNM1L
trans-Golgi network	110	7.6	0.029	CC	turq	GCC2;ATP9B
endosome	397	4.21	0.0142	CC	turq	WASHC4;TRAPPC10;DNAJC13;ATP9B
phosphoprotein binding	51	16.39	0.00701	MF	turq	TBK1;CBLB
magnesium ion binding	135	9.29	0.00418	MF	turq	STK38L;IRAK4;ATP9B
protein serine/threonine kinase activity	249	6.71	0.00284	MF	turq	CDK17;TBK1;STK38L;IRAK4
actin filament binding	126	6.63	0.0371	MF	turq	SCIN
ubiquitin protein ligase activity	135	6.19	0.0419	MF	turq	LTN1;CBLB
ubiquitin-like protein ligase activity	142	5.89	0.0459	MF	turq	LTN1;CBLB
protein kinase activity	388	4.31	0.0132	MF	turq	CDK17;TBK1;STK38L;IRAK4
phosphotransferase activity	454	3.68	0.0221	MF	turq	CDK17;TBK1;STK38L;IRAK4

## Sheet: hub gene KEGG analysis
Term	requ	ref	p	p_adjust	gene	Module
Selenocompound metabolism	1	15	0.017995	0.176833	TXNRD1	blue
Citrate cycle (TCA cycle)	1	28	0.032386	0.176833	DLD	blue
Glyoxylate and dicarboxylate metabolism	1	31	0.035678	0.176833	DLD	blue
Propanoate metabolism	1	32	0.0367729	0.176833	DLD	blue
Pyruvate metabolism	1	32	0.0367729	0.176833	DLD	blue
Glycine, serine and threonine metabolism	1	37	0.0422297	0.176833	DLD	blue
Tryptophan metabolism	1	39	0.0444041	0.176833	DLD	blue
Valine, leucine and isoleucine degradation	1	44	0.0498192	0.176833	DLD	blue
Toll-like receptor signaling pathway	2	84	0.00525087	0.0525087	IRAK4|TBK1	turq
Influenza A	2	135	0.0128627	0.0783077	IRAK4|TBK1	turq
Herpes simplex virus 1 infection	2	150	0.0156615	0.0783077	IRAK4|TBK1	turq
Endocytosis	2	228	0.0338344	0.123776	CBLB|WASHC4	turq
Base excision repair	1	29	0.0371328	0.123776	TDG	turq
