# Supplementary material for: Selenium yeast modulated ileal transcriptome and microbiota to ameliorate egg production in aged laying hens
Source: Research Square preprint supplement (doi:10.21203/rs.3.rs-104581/v1), 2020-11-13
Supplement: Supplementary file 2 [file c11a1a66600b32b4c9cf112c.xlsx]

## Sheet: oxidative
		SD5	SD7	SD8	SD9	SY0.15 1	SY0.15 2	SY0.15 3	SY0.15 7	SY0.30 2	SY0.30 4	SY0.30 7	SY0.30 8	SY0.45 3	SY0.45 4	SY0.45 7
ncam1 interactions		0.191608	0.142657	0.184615	0.104196	0.193706	0.144755	0.268531	0.35035	0.176923	0.18951	0.244056	0.33986	0.368531	0.415385	0.423776
phosphatidylcholine metabolic process		-0.303154	-0.154678	-0.34569	-0.110613	0.176217	0.106127	0.0567978	-0.33117	0.144273	0.0482809	-0.0333898	-0.321055	-0.322206	-0.311431	-0.306272
neuron projection extension involved in neuron projection guidance		-0.0839161	0.0685315	-0.0027972	0.079021	0.18042	0.106294	0.0867133	-0.0874126	0.188811	0.100699	-0.0118881	0.0370629	-0.048951	-0.158741	-0.0832168
organ or tissue specific immune response		-0.272541	-0.173452	-0.27309	-0.141455	0.0616115	0.0119515	-0.0430576	-0.217316	0.0484296	-0.0340838	-0.0887839	-0.350114	-0.368576	-0.358343	-0.356805
cardiac atrium development		0.175524	0.198601	0.194406	0.118881	-0.135664	-0.136364	-0.158042	-0.208392	-0.0517483	-0.117483	-0.0888112	-0.0986014	-0.172727	-0.183217	-0.174825
regulation of receptor internalization		-0.0839161	0.0685315	-0.0027972	0.079021	0.18042	0.106294	0.0867133	-0.0874126	0.188811	0.100699	-0.0118881	0.0370629	-0.048951	-0.158741	-0.0832168
neutral lipid catabolic process		-0.06711	0.0731252	-0.0801476	0.0546855	0.240982	0.2604	0.24849	-0.0261309	0.271858	0.131587	0.10736	-0.111632	-0.0706794	-0.0829116	-0.0534845
triglyceride catabolic process		-0.06711	0.0731252	-0.0801476	0.0546855	0.240982	0.2604	0.24849	-0.0261309	0.271858	0.131587	0.10736	-0.111632	-0.0706794	-0.0829116	-0.0534845
heterophilic cell cell adhesion via plasma membrane cell adhesion molecules		0.0251748	-0.0167832	-0.0832168	-0.100699	-0.209091	-0.242657	-0.21049	-0.0748252	-0.22028	-0.256643	-0.203497	0.0153846	-0.0797203	0.0195804	-0.124476
glycerolipid catabolic process		-0.0178874	0.101015	-0.020116	0.103417	0.275376	0.279042	0.268854	0.0500016	0.279208	0.17466	0.149851	-0.0288561	0.0198801	0.013988	0.0356398
oligodendrocyte development		0.241259	0.252448	0.181818	0.343357	0.4	0.425874	0.386014	0.204895	0.398601	0.348252	0.348252	0.281119	0.237063	0.123077	0.0475524
eye photoreceptor cell development		-0.0839161	0.0685315	-0.0027972	0.079021	0.18042	0.106294	0.0867133	-0.0874126	0.188811	0.100699	-0.0118881	0.0370629	-0.048951	-0.158741	-0.0832168
protein o linked glycosylation		0.00445509	-0.000150201	0.00063602	-0.0161073	-0.265251	-0.179988	-0.256821	-0.324268	-0.136245	-0.160349	-0.166455	-0.174066	-0.32912	-0.339676	-0.329078
intestinal absorption		0.0828079	0.192878	0.073893	0.156432	0.278125	0.296185	0.282102	0.057969	0.314932	0.219468	0.200746	0.0482513	0.0436394	0.054808	0.0827956
cajal body		0.0321678	-0.065035	-0.0237762	-0.0874126	0.0566434	-0.0216783	0.058042	0.233566	-0.0237762	0.0951049	0.0839161	0.169231	0.205594	0.227972	0.133566
organic hydroxy compound transmembrane transporter activity		0.0566434	0.206294	0.269231	0.265734	0.237762	0.0825175	0.175524	0.321678	0.15035	0.115385	0.121678	0.299301	0.339161	0.406294	0.377622
palmitoyltransferase activity		0.286745	0.23261	0.25514	0.216793	0.143184	0.137763	0.159206	0.0706874	0.229691	0.196207	0.199691	0.0869733	0.00448401	-0.0643334	-0.0922556
sterol transporter activity		0.0142605	0.104152	-0.0329092	0.126283	0.291266	0.241359	0.210411	0.00977827	0.284709	0.21538	0.167896	-0.00280494	0.00458291	0.0172786	0.0157895
transition metal ion transmembrane transporter activity		-0.0167832	0.0181818	0.0041958	-0.041958	-0.284615	-0.258042	-0.27972	-0.307692	-0.232168	-0.224476	-0.236364	-0.152448	-0.301399	-0.30979	-0.311888
chemokine activity		-0.00489511	-0.0888112	-0.301399	-0.279021	-0.0811189	-0.226573	-0.093007	-0.093007	-0.0853147	-0.104196	-0.267133	-0.204895	0.0755245	-0.116783	-0.139161
regulatory t cell differentiation		0.0412587	-0.0846154	-0.0643357	-0.106993	-0.0335664	-0.0391608	0.0412587	-0.0160839	-0.100699	-0.0734266	-0.113986	0.131469	0.25035	0.0776224	0.0755245
post translational modification: synthesis of gpi anchored proteins		-0.263636	-0.0804196	-0.0335664	-0.0475524	0.216783	-9.7e-21	-0.0622378	0.160839	0.158741	0.0384615	-0.0748252	-0.114685	-0.220979	-0.0881119	-0.160839
transport of bile salts and organic acids metal ions and amine compounds		0.193226	0.234729	0.179139	0.224284	0.125234	0.132608	0.0880229	-0.0709209	0.134377	0.102408	0.0721194	-0.00482843	-0.0745132	-0.119618	-0.108291
plasma lipoprotein remodeling		0.0181806	0.104169	-0.0311723	0.132501	0.290136	0.247659	0.21157	0.00764792	0.281939	0.211782	0.163093	-0.00351335	0.00261237	0.0161109	0.0255696

## Sheet: aging
		SD5	SD7	SD8	SD9	SY0.15 1	SY0.15 2	SY0.15 3	SY0.15 7	SY0.30 2	SY0.30 4	SY0.30 7	SY0.30 8	SY0.45 3	SY0.45 4	SY0.45 7
gluconeogenesis		-0.0582192	0.15411	-0.0787671	0.31621	0.402968	0.174658	0.252283	-0.332192	0.332192	0.268265	0.188356	-0.325342	-0.222603	-0.341324	-0.206621
phosphatidylcholine metabolic process		-0.272831	-0.0810502	-0.311644	-0.0171233	0.450913	0.291096	0.188356	-0.380137	0.389269	0.206621	0.103881	-0.343607	-0.400685	-0.437215	-0.393836
organ or tissue specific immune response		-0.272831	-0.0810502	-0.311644	-0.0171233	0.450913	0.291096	0.188356	-0.380137	0.389269	0.206621	0.103881	-0.343607	-0.400685	-0.437215	-0.393836
digestive system process		-0.0691556	0.123792	-0.0208775	0.0819884	0.292062	0.293195	0.257355	-0.130966	0.351125	0.18183	0.123325	-0.102929	-0.0909432	-0.0724799	-0.0506027
regulation of digestive system process		0.00162246	0.156535	0.0353317	0.187651	0.431461	0.290617	0.251831	-0.0597935	0.381028	0.24767	0.162552	0.00683896	-0.0208482	0.0363334	0.00997192
intestinal absorption		-0.248862	-0.0101872	-0.217139	-0.0891946	0.227106	0.29405	0.228202	-0.329516	0.339454	0.125287	0.0725254	-0.385351	-0.308105	-0.365883	-0.26728
carboxy lyase activity		-0.0162942	0.178699	-0.0139905	0.213442	0.279984	0.138963	0.147699	-0.182134	0.236769	0.202983	0.167213	-0.197281	-0.132222	-0.272112	-0.210519
carbon carbon lyase activity		-0.0162942	0.178699	-0.0139905	0.213442	0.279984	0.138963	0.147699	-0.182134	0.236769	0.202983	0.167213	-0.197281	-0.132222	-0.272112	-0.210519
phosphatidylserine binding		-0.157932	0.0622386	-0.200294	0.0191358	0.0629106	0.0637447	0.0357354	-0.245076	0.0976051	0.0882897	0.0420978	-0.22276	-0.264056	-0.275065	-0.25912
transport of bile salts and organic acids metal ions and amine compounds		0.0148402	0.229452	-0.00799087	0.15411	-0.222603	-0.0673516	-0.0810502	-0.265982	0.0513699	-0.0239726	-0.00342466	-0.151826	-0.181507	-0.288813	-0.307078

## Sheet: selenoprotein
		SD5	SD7	SD8	SD9	SY0.15 1	SY0.15 2	SY0.15 3	SY0.15 7	SY0.30 2	SY0.30 4	SY0.30 7	SY0.30 8	SY0.45 3	SY0.45 4	SY0.45 7
reactome_phospholipid_metabolism		0.199971	0.449935	0.149978	0.299956	0.449935	0.449935	0.349949	0.199971	0.449935	0.349949	0.349949	0.199971	0.149978	0.0499927	0.0499927
reactome_glycerophospholipid_biosynthesis		0.199971	0.449935	0.149978	0.299956	0.449935	0.449935	0.349949	0.199971	0.449935	0.349949	0.349949	0.199971	0.149978	0.0499927	0.0499927
hallmark_mtorc1_signaling		0.0999855	0.149978	0.0999855	0.0999855	0.0499927	0.199971	-0.0499927	-0.0499927	-6.60751e-19	-6.60751e-19	-6.60751e-19	-0.0499927	-0.199971	-0.199971	-0.249964
formation_of_primary_germ_layer		0.0999855	0.149978	0.0999855	0.0999855	0.0499927	0.199971	-0.0499927	-0.0499927	-6.60751e-19	-6.60751e-19	-6.60751e-19	-0.0499927	-0.199971	-0.199971	-0.249964
organic_hydroxy_compound_transport		-0.0499927	-0.0499927	-0.149978	-0.0999855	-0.0499927	-6.60751e-19	0.0499927	0.149978	-0.0499927	0.0499927	0.0499927	0.0499927	0.199971	0.199971	0.199971
phospholipid_biosynthetic_process		0.199971	0.449935	0.149978	0.299956	0.449935	0.449935	0.349949	0.199971	0.449935	0.349949	0.349949	0.199971	0.149978	0.0499927	0.0499927
regulation_of_lipid_metabolic_process		0.0999855	0.149978	0.0999855	0.0999855	0.0499927	0.199971	-0.0499927	-0.0499927	-6.60751e-19	-6.60751e-19	-6.60751e-19	-0.0499927	-0.199971	-0.199971	-0.249964
multicellular_organism_growth		-0.0499927	-0.0499927	-0.149978	-0.0999855	-0.0499927	-6.60751e-19	0.0499927	0.149978	-0.0499927	0.0499927	0.0499927	0.0499927	0.199971	0.199971	0.199971
gastrulation		0.0999855	0.149978	0.0999855	0.0999855	0.0499927	0.199971	-0.0499927	-0.0499927	-6.60751e-19	-6.60751e-19	-6.60751e-19	-0.0499927	-0.199971	-0.199971	-0.249964
mesoderm_morphogenesis		0.0999855	0.149978	0.0999855	0.0999855	0.0499927	0.199971	-0.0499927	-0.0499927	-6.60751e-19	-6.60751e-19	-6.60751e-19	-0.0499927	-0.199971	-0.199971	-0.249964
glycerolipid_biosynthetic_process		0.199971	0.449935	0.149978	0.299956	0.449935	0.449935	0.349949	0.199971	0.449935	0.349949	0.349949	0.199971	0.149978	0.0499927	0.0499927
connective_tissue_development		-0.0499927	-0.0499927	-0.149978	-0.0999855	-0.0499927	-6.60751e-19	0.0499927	0.149978	-0.0499927	0.0499927	0.0499927	0.0499927	0.199971	0.199971	0.199971
lipid_localization		-0.0499927	-0.0499927	-0.149978	-0.0999855	-0.0499927	-6.60751e-19	0.0499927	0.149978	-0.0499927	0.0499927	0.0499927	0.0499927	0.199971	0.199971	0.199971
mesoderm_development		0.0999855	0.149978	0.0999855	0.0999855	0.0499927	0.199971	-0.0499927	-0.0499927	-6.60751e-19	-6.60751e-19	-6.60751e-19	-0.0499927	-0.199971	-0.199971	-0.249964
adipose_tissue_development		-0.0499927	-0.0499927	-0.149978	-0.0999855	-0.0499927	-6.60751e-19	0.0499927	0.149978	-0.0499927	0.0499927	0.0499927	0.0499927	0.199971	0.199971	0.199971
endocrine_process		-0.0499927	-0.0499927	-0.149978	-0.0999855	-0.0499927	-6.60751e-19	0.0499927	0.149978	-0.0499927	0.0499927	0.0499927	0.0499927	0.199971	0.199971	0.199971
nucleolar_part		0.0999855	0.149978	0.0999855	0.0999855	0.0499927	0.199971	-0.0499927	-0.0499927	-6.60751e-19	-6.60751e-19	-6.60751e-19	-0.0499927	-0.199971	-0.199971	-0.249964
ubiquitin_like_protein_ligase_binding		-0.299956	-0.149978	-0.0499927	-6.60751e-19	-0.249964	-0.299956	-0.299956	-0.199971	-0.299956	-0.299956	-0.299956	-0.0999855	-0.249964	-0.0499927	-0.199971
endocrine_hormone_secretion		-0.0499927	-0.0499927	-0.149978	-0.0999855	-0.0499927	-6.60751e-19	0.0499927	0.149978	-0.0499927	0.0499927	0.0499927	0.0499927	0.199971	0.199971	0.199971
positive_regulation_of_cold_induced_thermogenesis		-0.299956	-0.149978	-0.0499927	-6.60751e-19	-0.249964	-0.299956	-0.299956	-0.199971	-0.299956	-0.299956	-0.299956	-0.0999855	-0.249964	-0.0499927	-0.199971
adaptive_thermogenesis		-0.299956	-0.149978	-0.0499927	-6.60751e-19	-0.249964	-0.299956	-0.299956	-0.199971	-0.299956	-0.299956	-0.299956	-0.0999855	-0.249964	-0.0499927	-0.199971
fibrillar_center		0.0999855	0.149978	0.0999855	0.0999855	0.0499927	0.199971	-0.0499927	-0.0499927	-6.60751e-19	-6.60751e-19	-6.60751e-19	-0.0499927	-0.199971	-0.199971	-0.249964
reactome_selenoamino_acid_metabolism		0.0999855	0.149978	0.0999855	0.0999855	0.0499927	0.199971	-0.0499927	-0.0499927	-6.60751e-19	-6.60751e-19	-6.60751e-19	-0.0499927	-0.199971	-0.199971	-0.249964
reactome_transcriptional_regulation_by_tp53		0.0999855	0.149978	0.0999855	0.0999855	0.0499927	0.199971	-0.0499927	-0.0499927	-6.60751e-19	-6.60751e-19	-6.60751e-19	-0.0499927	-0.199971	-0.199971	-0.249964
reactome_regulation_of_lipid_metabolism_by_peroxisome_proliferator_activated_receptor_α_pparalpha		0.0999855	0.149978	0.0999855	0.0999855	0.0499927	0.199971	-0.0499927	-0.0499927	-6.60751e-19	-6.60751e-19	-6.60751e-19	-0.0499927	-0.199971	-0.199971	-0.249964
reactome_tp53_regulates_metabolic_genes		0.0999855	0.149978	0.0999855	0.0999855	0.0499927	0.199971	-0.0499927	-0.0499927	-6.60751e-19	-6.60751e-19	-6.60751e-19	-0.0499927	-0.199971	-0.199971	-0.249964
reactome_infectious_disease		0.0999855	0.149978	0.0999855	0.0999855	0.0499927	0.199971	-0.0499927	-0.0499927	-6.60751e-19	-6.60751e-19	-6.60751e-19	-0.0499927	-0.199971	-0.199971	-0.249964
